# Supplementary material
Source: ML conference proceedings conference paper supplement (https://openreview.net/forum?id=85d8bg9RvDT)
Supplement: supplementary_material [file attachment]

## APPENDIX

### A BEAM SEARCH ALGORITHM FOR INFERENCE

In this section, we present the beam search algorithm for inference in detail. Given user embedding  $x$  and structure model with parameter  $\theta$ , the beam search algorithm (1) picks the top  $B$  nodes at the first layer; (2) picks the top  $B$  nodes among the successors of the chosen nodes at the previous layer; (3) outputs the final  $B$  nodes at the final layer. The algorithm is shown in Algorithm 1. In each layer, choosing top  $B$  from  $K \times B$  candidates has a time complexity of  $O(KB \log B)$ . The total complexity is  $O(DKB \log B)$ .

---

**Algorithm 1** Beam search algorithm

---

**Input** user  $x$ , structure model with parameter  $\theta$ , beam size  $B$ .  
 Let  $C_1 = \{c_{1,1}, \dots, c_{1,B}\}$  be top  $B$  entries of  $\{p(c_1|x, \theta) : c_1 \in \{1, \dots, K\}\}$ .  
**for**  $d = 2$  to  $D$  **do**  
   Let  $C_d = \{(c_{1,1}, \dots, c_{d,1}), \dots, (c_{1,B}, \dots, c_{d,B})\}$  be the top  $B$  entries of the set of all successors of  $C_{d-1}$  defined as follows.  
      $\{p(c_1, \dots, c_{d-1}|x, \theta)p(c_d|x, c_1, \dots, c_{d-1}, \theta) : (c_1, \dots, c_{d-1}) \in C_{d-1}, c_d \in \{1, \dots, K\}\}$ .  
**end for**  
**Output**  $C_D$ , a set of  $B$  paths.

---

### B COORDINATE DESCENT ALGORITHM FOR PENALIZED PATH ASSIGNMENT

In this section, we illustrate the coordinate descent algorithm used in path assignment with penalty in detail. Recall that in penalized M-step, we want to maximize the following objective over all assignments  $\{\pi_j(v)\}_{j=1}^J$ 's.

$$\arg \max_{\{\pi_j(v)\}_{j=1}^J} \sum_{v=1}^V \left( N_v \log \left( \sum_{j=1}^J s[v, \pi_j(v)] \right) - \log N_v \right) - \alpha \cdot \sum_{c \in [K]^D} f(|c|). \quad (6)$$

Now we apply the coordinate descent algorithm on item  $v$  while fix the assignments of all other items. Notice that the term  $-\log N_v$  is irrelevant to  $\pi_j(v)$  and hence can be dropped. For each item  $v$ , the partial objective function can be written as

$$\arg \max_{\pi_1(v), \dots, \pi_J(v)} N_v \log \left( \sum_{j=1}^J s[v, \pi_j(v)] \right) - \alpha \sum_{j=1}^J f(|\pi_j(v)|), \quad (7)$$

The coordinate descent algorithm is given as Algorithm 2. In practise, three to five iterations are enough to ensure the algorithm converges. The time complexity grows linearly with vocabulary size  $V$ , multiplicity of paths  $J$  as well as number of candidate paths  $S$ .

### C MORE DETAILS OF THE EXPERIMENTS

#### C.1 INFERENCE TIME

We present here the average inference times on Amazon books dataset for Deep Retrieval and brute-force method.

We conclude that the inference speed of DR is 4 times faster than brute-force method. Moreover, the inference time of DR grows sub-linearly as the number of items increases, whereas the inference time of brute-force methods grows linearly. So DR enjoys more advantage on time efficiency for larger datasets.

**Algorithm 2** Coordinate descent algorithm for penalized path assignment

---

**Input:** Score functions  $\log s[v, c]$ . Number of iterations  $T$ .  
Initialize  $|c| = 0$  for all paths  $c$ .  
**for**  $t = 1$  **to**  $T$  **do**  
  **for** all items  $v$  **do**  
     $\text{sum} \leftarrow 0$ .  
    **for**  $j = 1$  **to**  $J$  **do**  
      **if**  $t > 1$  **then**  
         $|\pi_j^{(t-1)}(v)| \leftarrow |\pi_j^{(t-1)}(v)| - 1$ .  
      **end if**  
      **for** all candidate paths  $c$  of item  $v$  such that  $c \notin \{\pi_l^{(t)}(v)\}_{l=1}^{j-1}$  **do**  
        Compute penalized scores  

$$\tilde{s}[v, c] = \log(s[v, c] + \text{sum}) - \alpha(f(|c| + 1) - f(|c|)).$$
  
      **end for**  
       $\pi_j^{(t)}(v) \leftarrow \arg \max_c \tilde{s}[v, c]$ .  
       $\text{sum} \leftarrow \text{sum} + s[v, \pi_j^{(t)}(v)]$ .  
       $|\pi_j^{(t)}(v)| \leftarrow |\pi_j^{(t)}(v)| + 1$ .  
    **end for**  
  **end for**  
**end for**  
**Output:** path assignments  $\{\pi_j^{(T)}(v)\}_{j=1}^J$ .

---

**C.2 CHOICE OF NUMBER OF LAYERS D**

Here we present the result for  $D = 2, 3$  and  $4$  for Amazon books dataset.

We observe that (1) Using  $D = 2$  with the same  $K$  would hurt performance; (2) Using  $D = 4$  with the same  $K$  would not help. (3) Models with the same number of possible paths ( $K = 1000, D = 2$  and  $K = 100, D = 3$ ) have similar performance. However the number of parameters is of order  $KD^2$ , so a deeper model can achieve the same performance with fewer parameters. As a trade-off between model performance and memory usage, we choose  $D = 3$  in all experiments.

**C.3 TOP PATH SIZE V.S. PENALTY FACTOR**

Here we present the relationship between top path size and penalty factor in Amazon book dataset. As we can see, a smaller penalty factor leads to a larger path size hence heavier computation in the following reranking stage.

**C.4 PRECISION AND F-MEASURE AGAINST HYPERPARAMETERS**

Here we plot the precision@200 and F-measure@200 against hyperparameters in the Amazon books datasets. The results of precision@200 are shown in Figure 3 and the results of F-measure@200 are shown in Figure 4. We can see that both the precision and the F-measure follow the same trend as the recall shown in Section 4.3.

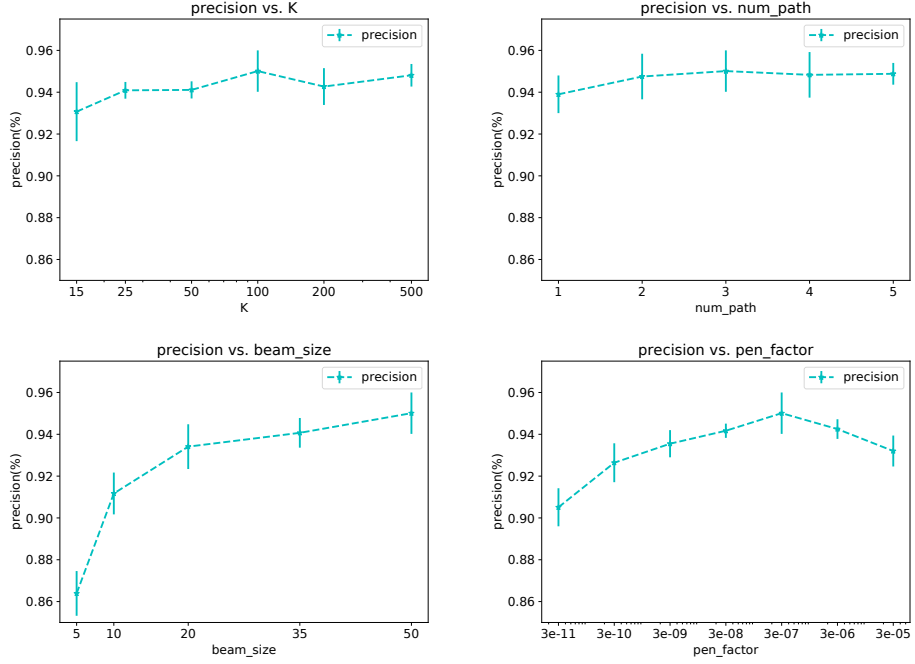

Figure 3: Relationship between precision@200 in Amazon Books experiment and model width  $K$ , number of paths  $J$ , beam size  $B$  and penalty factor  $\alpha$ , respectively.

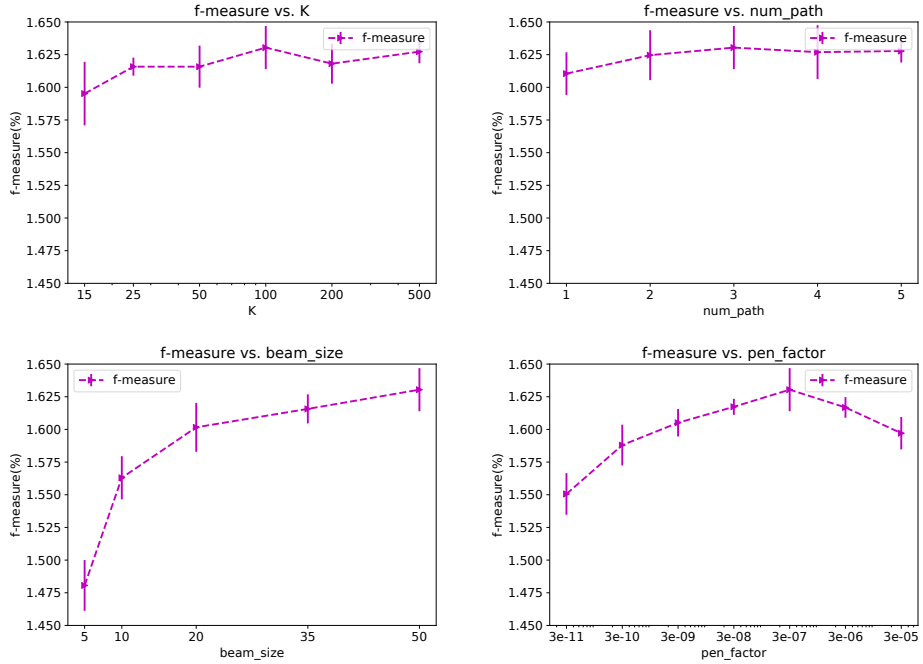

Figure 4: Relationship between F-measure@200 in Amazon Books experiment and model width  $K$ , number of paths  $J$ , beam size  $B$  and penalty factor  $\alpha$ , respectively.

Table 3: Comparison of inference time on Amazon Books.

|                |                       |
|----------------|-----------------------|
| Deep Retrieval | 0.266 ms per instance |
| Brute-force    | 1.064 ms per instance |

Table 4: Comparison of performance for different model depth  $D$ .

| $(K, D)$  | Precision @ 200 | Recall @ 200 | F-measure @ 200 |
|-----------|-----------------|--------------|-----------------|
| (100, 2)  | 0.93%           | 13.34%       | 1.59%           |
| (100, 3)  | 0.95%           | 13.74%       | 1.63%           |
| (100, 4)  | 0.95%           | 13.67%       | 1.63%           |
| (1000, 2) | 0.95%           | 13.68%       | 1.62%           |

Table 5: Relationship between the path with most items (called top path) and penalty factor  $\alpha$ 

| Penalty factor | 3e-10          | 3e-9          | 3e-8         | 3e-7         | 3e-6        |
|----------------|----------------|---------------|--------------|--------------|-------------|
| Top path size  | 3837 $\pm$ 197 | 1948 $\pm$ 30 | 956 $\pm$ 29 | 459 $\pm$ 13 | 242 $\pm$ 1 |
